# Supplementary material
Source: PubMed Central journal article supplement (PMC10834255)
Supplement: awad327_supplementary_data.pdf [file awad327_supplementary_data.pdf]

**Supplementary Table I Demographic, clinical, and pathological description of the four mutation carriers**

| <b>Mutation</b> | <b>Sex</b> | <b>Handedness</b> | <b>Years of education</b> | <b>Age at onset</b> | <b>Age at scan</b> | <b>MMSE</b> | <b>CDR</b> | <b>Clinical presentation</b>                                                                 | <b>Pathology</b> |
|-----------------|------------|-------------------|---------------------------|---------------------|--------------------|-------------|------------|----------------------------------------------------------------------------------------------|------------------|
| GRN             | F          | R                 | 12                        | 63                  | 67                 | 28          | 0          | Difficulty articulating words                                                                | TDP-A            |
| GRN             | F          | R                 | 20                        | 67                  | 69                 | 30          | 0          | Difficulty articulating polysyllabic words; simplified sentences with morphosyntactic errors | TDP-A            |
| GRN             | F          | R                 | 16                        | 60                  | 63                 | 26          | 0.5        | Shorter, simplified sentences; word-finding difficulty                                       | ---              |
| GRN             | M          | R                 | 16                        | 62                  | 65                 | 25          | 1          | Difficulty with speech initiation and finding words; shorter sentences                       | ---              |

F = female; M = male; R = right-handed; MMSE = Mini-Mental State Examination; CDR = Clinical Dementia Rating; TDP-A = transactive response DNA-binding protein 43kD type A.

**Supplementary Table 2 Non-exhaustive list of deviant motor speech characteristics indicative of apraxia of speech or dysarthria**

| <b>Apraxia of Speech</b>                                                 | <b>Spastic Dysarthria</b>                     | <b>Hypokinetic Dysarthria</b>                  |
|--------------------------------------------------------------------------|-----------------------------------------------|------------------------------------------------|
| Slow speech rate                                                         | Slow speech rate                              | Accelerated speech rate                        |
| Distorted articulation                                                   | Strained-strangled/harsh voice quality        | Breathy/harsh voice quality                    |
| Distorted sound substitutions and/or additions                           | Imprecise articulation                        | Short rushes of speech                         |
| Sound sequencing errors                                                  | Audible/strenuous inspiration                 | Imprecise articulation                         |
| Articulatory groping/false starts                                        | Hypernasality                                 | Reduced loudness and stress                    |
| Trial-and-error articulation                                             | Slow, regular speech alternating motion rates | Inappropriate silences                         |
| Difficulty initiating speech                                             | Pitch breaks                                  | Repeated sounds                                |
| Reduced accuracy with increased utterance length, complexity and/or rate |                                               | Rapid, blurred speech alternating motion rates |
| Prosodic alterations                                                     |                                               | Monopitch and monoloudness                     |

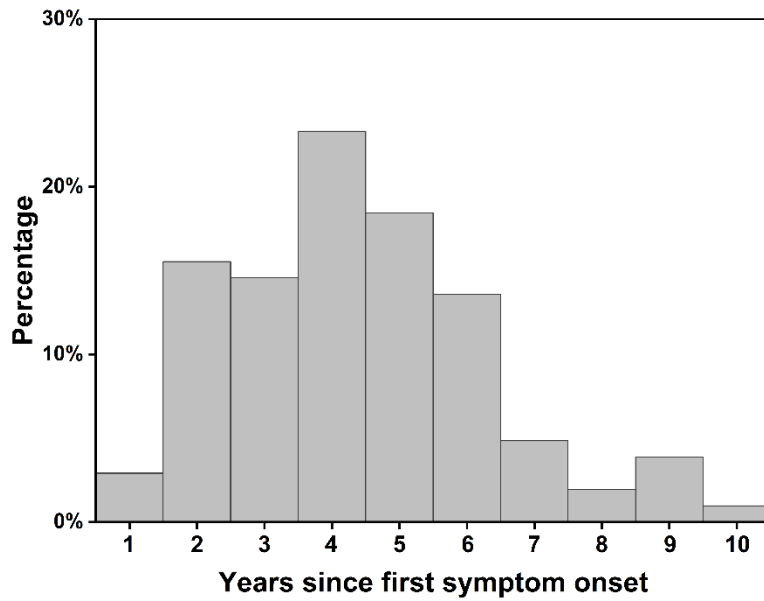

**Supplementary Figure 1 Histogram of years since first symptom onset.** The figure shows the sample composition ( $n = 103$ ) in terms of the time elapsed between first symptom onset and scan acquisition.

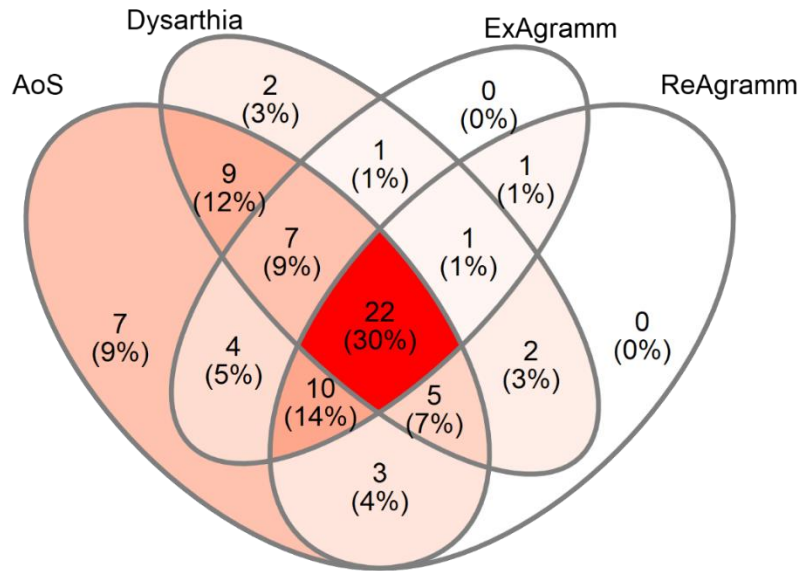

**Supplementary Figure 2 Characteristic speech-language symptoms in nvfPPA.** The figure (Venn diagram) shows a breakdown of the subset of patients ( $n = 74$ ) with complete cross-sectional data into those with AoS, dysarthria, expressive agrammatism (ExAgramm), or receptive agrammatism (ReAgramm), or any combination of these.
